# Supplementary material for: Sex-Stratified Single-Cell RNA-Seq Analysis Identifies Sex-Specific and Cell Type-Specific Transcriptional Responses in Alzheimer’s Disease Across Two Brain Regions
Source: PubMed Central journal article supplement (PMC8786804; doi:10.1007/s12035-021-02591-8), 2021-10-20

**a Prefrontal Cortex: Astrocytes**

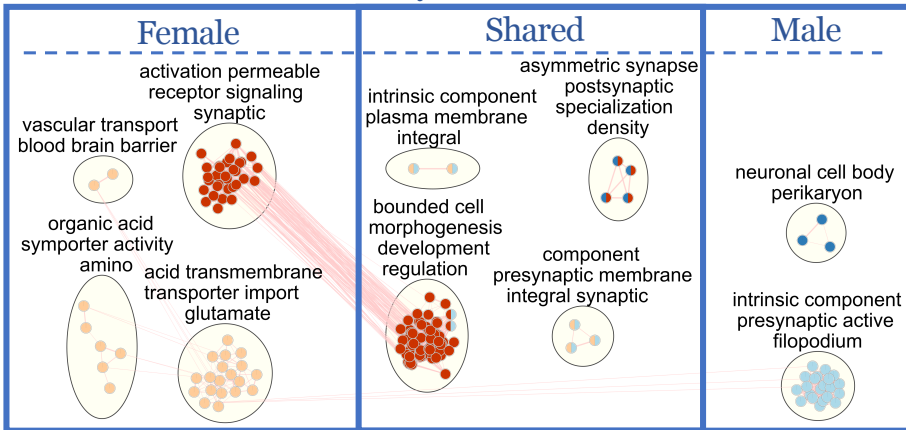

**AD versus non-AD Pathway networks**

- Female downregulated
- Female upregulated
- Male downregulated
- Male upregulated

**b Entorhinal Cortex: Astrocytes**

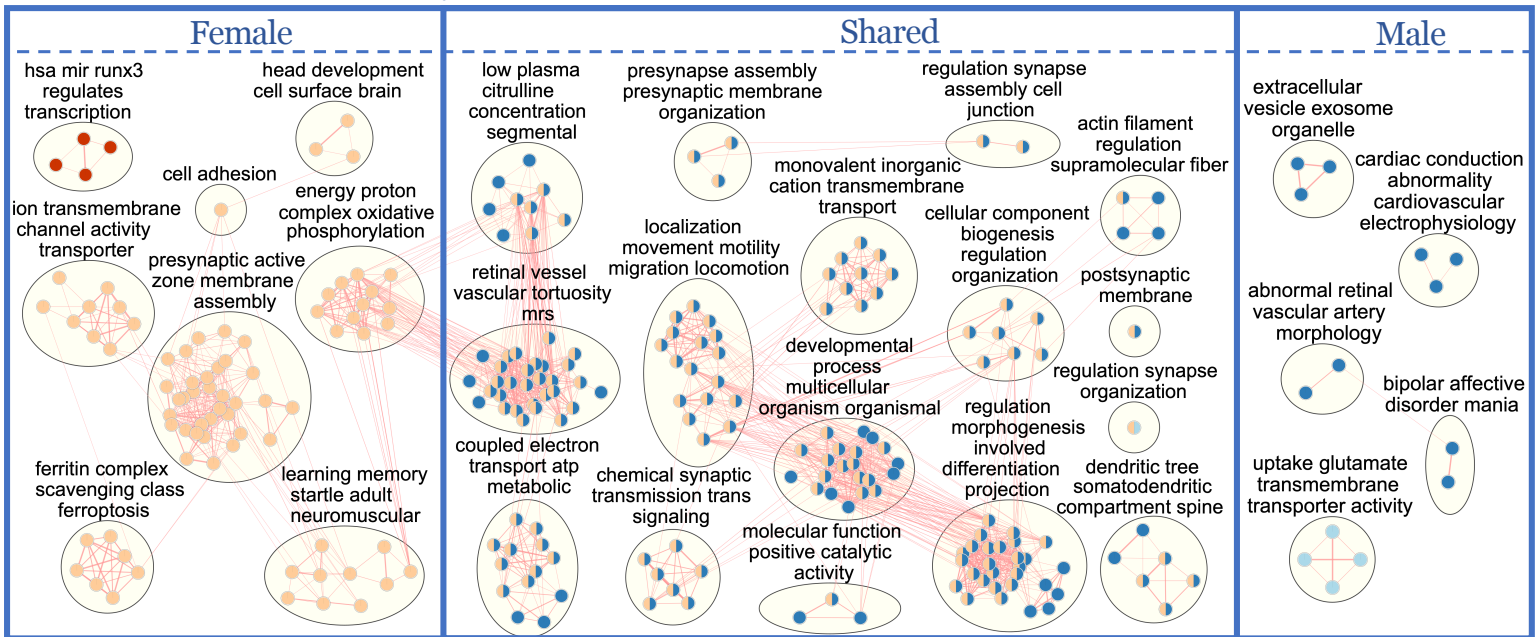

Supplement: 12035_2021_2591_MOESM4_ESM.pdf [file 12035_2021_2591_MOESM4_ESM.pdf]
